# Supplementary material for: Suctioning semirigid ureteroscopic lithotomy versus minimally invasive percutaneous nephrolithotomy for large upper ureteral stones: a retrospective study
Source: PubMed Central journal article supplement — Transl Androl Urol. 2021 Mar;10(3):1056–63. doi: 10.21037/tau-20-1218 (PMC8039583; doi:10.21037/tau-20-1218), 2021-03
Supplement: tau-10-03-1056-dss.pdf [file tau-10-03-1056-dss.pdf]

## Data Sharing Statement

|                     |                                                                                                                                                     |                                                                                                                                        |
|---------------------|-----------------------------------------------------------------------------------------------------------------------------------------------------|----------------------------------------------------------------------------------------------------------------------------------------|
| <b>Article Info</b> | http://dx.doi.org/10.21037/tau-20-1218                                                                                                              |                                                                                                                                        |
| <b>Item</b>         | <b>Question</b>                                                                                                                                     | <b>Authors' Response<br/>(place "-" if not applicable)</b>                                                                             |
| 1                   | Would you like to share data collected for your study to others?                                                                                    | Yes                                                                                                                                    |
| 2                   | If not, would you like to share the reason for your decision?                                                                                       | -                                                                                                                                      |
| 3                   | What data in particular will be shared?                                                                                                             | The treatment outcomes in particular will be shared.                                                                                   |
| 4                   | Any other documents will be shared? Such as study protocol, statistical analysis plan, informed consent form, clinical study report, analytic code. | Statistical analysis plan, informed consent form, and clinical study report will also be shared if requested                           |
| 5                   | When will data availability begin?                                                                                                                  | From the publication date.                                                                                                             |
| 6                   | When will data availability end?                                                                                                                    | Two years within the publication date, since the technique or survival date may be updated over time.                                  |
| 7                   | To whom will you share the data?                                                                                                                    | Urologists who will be interested in the lithotripsy.                                                                                  |
| 8                   | For what type of analysis or purpose?                                                                                                               | For analysis to evaluate the effectiveness and safety of suctioning semirigid ureteroscopic lithotomy for large upper ureteral stones. |
| 9                   | How or where can the data/documents be obtained?                                                                                                    | Emails could be sent to the address below to obtain the shared data: zengfeng0317@163.com                                              |
| 10                  | Any other restrictions?                                                                                                                             | We may balance the potential benefits and risks for each request and then provide the data that could be shared.                       |
